# Supplementary material
Source: publisher site journal article supplement (https://www.spandidos-publications.com/7462/downloadSupplementary)
Supplement: Supplementary file 1 [file downloadSupplementary]

## Sheet: Sheet1
Table SIII. The primer sequences of human DEPP1 and GAPDH genes used in the study.
	Forward primer (From 5' to 3')	Reverse primer (From 5' to 3')
DEPP1	GTGAGGTCTATATCTCGACTGGC	ACTGAAACGTGCGGTGATGT
GAPDH	CATGGACTGTGGTCATGAGT	CCATGTTCGTCATGGGTGTGA
